# Supplementary material for: A controllable growth-doping approach to synthesize bright white-light-emitting Cd:In2S3 nanocrystals
Source: Royal Society of Chemistry journal article supplement (doi:10.1039/c3nr00878a), 2013-01-01
Supplement: c3nr00878a.pdf [file c3nr00878a.pdf]

## Electronic Supplementary Information

### A Controllable Growth-Doping Approach to Synthesize Bright White-Light-Emitting Cd:In<sub>2</sub>S<sub>3</sub> Nanocrystals

Jian Feng, Hui Zhu and Xiurong Yang\*

#### Experimental Section

**Materials.** Technical grade (90%) octadecene (ODE), indium acetate (In(Ac)<sub>3</sub>, 99.99%), cadmium acetate (Cd(Ac)<sub>2</sub>), oleic acid (OA, 90%), n-dodecylthiol (DDT, 99.9%), Rhodamine 6G (99%), were purchased from Aldrich. Sulfur powder (S, 99.99%), chloroform (AR), methanol (AR), were purchased from Beijing Chemical Reagent Ltd, China. All chemicals were used without further purification.

**Synthesis of alloyed Cd-In-S QDs and Cd:In<sub>2</sub>S<sub>3</sub> NCs.** Alloyed Cd-In-S QDs were prepared by a reported method. Cd:In<sub>2</sub>S<sub>3</sub> NCs were synthesized by an adaptation of this method. For a typical synthetic reaction, 0.1 mmol indium acetate, 0.04 mmol cadmium acetate, 0.4 mmol oleic acid (OA) and 4 g of ODE were loaded into a three-neck reaction flask. Then the mixture was heated to 180 °C until the solution became clear. 0.3 mmol sulfur dissolved in ODE was quickly injected into the reaction solution at 240 °C and reacted a fixed time. Finally, the solution was cooled to room temperature and precipitated with excess methanol. The flocculent precipitate was centrifuged at 13000 rpm for 10 min and the supernatant was decanted. Then the precipitation was redispersed in 5 mL of chloroform. The above centrifugation and isolation procedure was repeated three times for purification of the Cd:In<sub>2</sub>S<sub>3</sub> NCs. The isolated NCs could be redispersed in various nonpolar organic solvents including hexane, toluene, decane, and chloroform.

**Transmission Electron Microscopy (TEM).** TEM images were taken on a FEI Tecnai G<sup>2</sup> F20

transmission electron microscope with an acceleration voltage of 200 kV. Carbon-coated copper grids were dipped in the chloroform solution to deposit nanocrystals onto the film. The EDX analyses were performed using carbon-coated nickel grids.

**X-ray Powder Diffraction (XRD).** XRD patterns were obtained using a Rigaku D/max-2500 X-ray diffractometer with graphite monochromated Cu K $\alpha$  radiation ( $\lambda=1.5418 \text{ \AA}$ ).

**Optical Measurements.** For optical analyses, these purified alloyed Cd-In-S QDs and Cd:In<sub>2</sub>S<sub>3</sub> NCs were redispersed in chloroform to an optical density between 0.1-0.5. Then UV-vis spectra were recorded on a Cary 50 (Varian) spectrophotometer. Photoluminescence excitation (PLE) and photoluminescence (PL) spectra were taken using a Perkin Elmer-LS55 luminescence spectrometer. The PL quantum yields of Cd:In<sub>2</sub>S<sub>3</sub> NCs were determined by comparing the integrated emission of the samples to that of Rhodamine 6G (Rhodamine 6G in ethanol, QY=95%) solutions with the same optical density at the excitation wavelength and similar fluorescence wavelength.

**ICP-MS analysis.** The purified alloyed Cd-In-S QDs and Cd:In<sub>2</sub>S<sub>3</sub> NCs were digested with HNO<sub>3</sub>. The obtained clear solutions were diluted with distilled water and the content of In<sup>3+</sup> and Cd<sup>2+</sup> ions was determined by inductively coupled plasma mass spectroscopy (ICP-OES-MS, Thermo Jarrell-Ash Corporation, Franklin, MA, USA).

**White-light-emitting LEDs.** The purified Cd:In<sub>2</sub>S<sub>3</sub> NCs were coated onto the commercial UV-LED (365 nm, 350 mW).

**Table S1.** The compositions of alloyed Cd-In-S QDs and Cd:In<sub>2</sub>S<sub>3</sub> NCs determined by ICP-MS analysis (normalized to In<sup>3+</sup> content)

| sample                                | capping agent | Cd content in precursor | Cd content in purified nanoparticle |
|---------------------------------------|---------------|-------------------------|-------------------------------------|
| Cd:In <sub>2</sub> S <sub>3</sub> NCs | OA            | 40%                     | 2.09%                               |
| alloyed Cd-In-S QDs                   | OA+DDT+TOP    | 40%                     | 38.6%                               |

**Table S2.** The compositions of Cd:In<sub>2</sub>S<sub>3</sub> NCs with different Cd content in precursor determined by ICP-MS analysis (normalized to In<sup>3+</sup> content)

| sample | Cd content in precursor | Cd content in purified nanoparticle |
|--------|-------------------------|-------------------------------------|
| 1      | 20%                     | 1.66%                               |
| 2      | 40%                     | 2.09%                               |
| 3      | 60%                     | 2.55%                               |

**Table S3.** Values of CIE coordinates and CCT for doped Cd:In<sub>2</sub>S<sub>3</sub> NCs samples with different amounts of Cd precursor

| sample | Cd content in precursor | X     | Y     | Correlated Color temperature (K) |
|--------|-------------------------|-------|-------|----------------------------------|
| 1      | 20%                     | 0.197 | 0.181 | -                                |
| 2      | 40%                     | 0.298 | 0.264 | 8214                             |
| 3      | 60%                     | 0.416 | 0.254 | 2410                             |

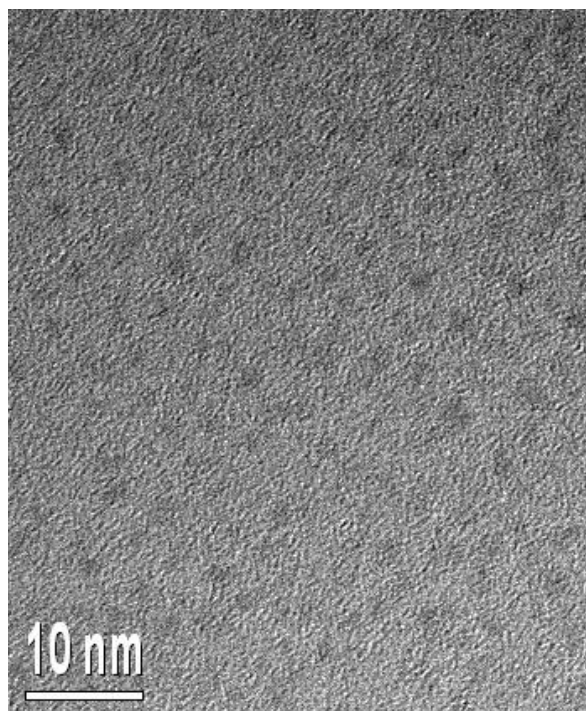

**Figure S1.** TEM micrograph of white-light emitting Cd:In<sub>2</sub>S<sub>3</sub> NCs.

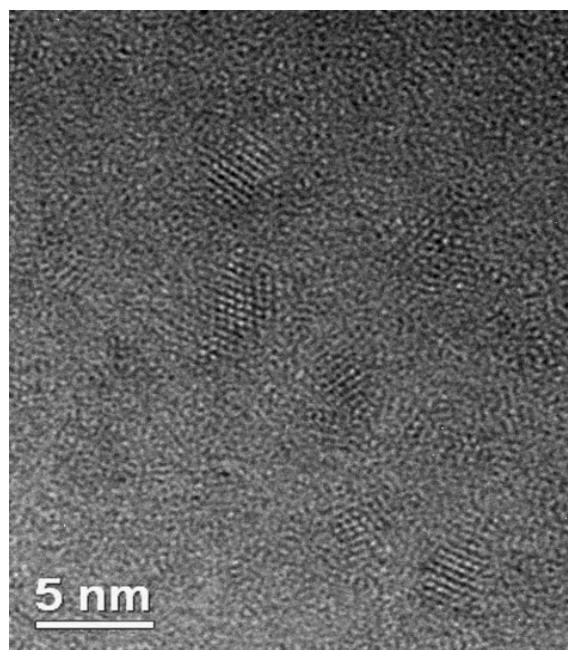

**Figure S2.** HRTEM micrograph of white-light emitting Cd:In<sub>2</sub>S<sub>3</sub> NCs.

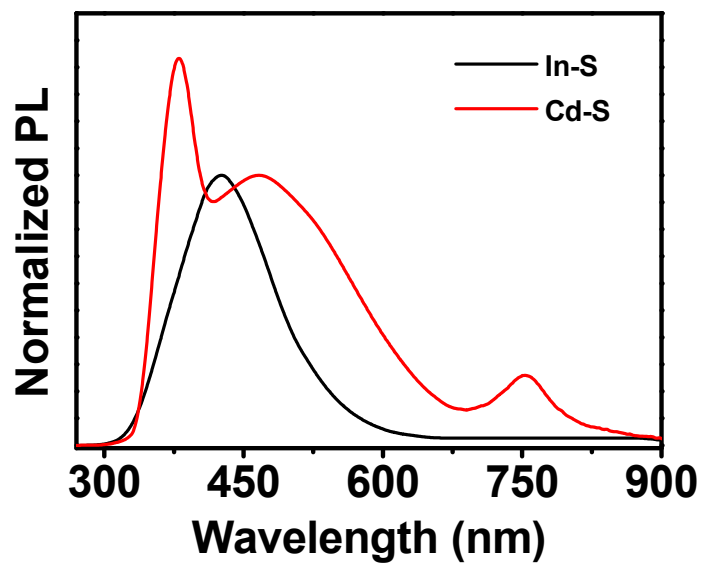

**Figure S3.** PL spectrum (excited at 360 nm) of  $\text{In}_2\text{S}_3$  and CdS synthesized under the same reaction condition.

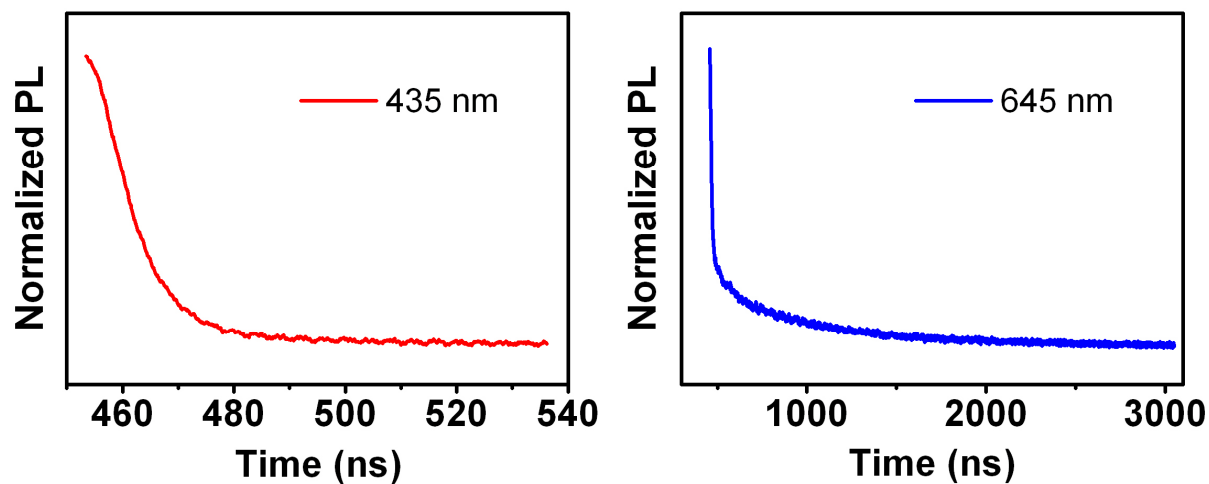

**Figure S4.** PL decay curves (excited at 360 nm) of white-light emitting Cd: $\text{In}_2\text{S}_3$  NCs (recorded at 435 and 645 nm, respectively)

**Table S4.** Decay Times and Amplitude Constant Ratios of  $\text{In}_2\text{S}_3$ , alloyed Cd-In-S and white-light emitting Cd: $\text{In}_2\text{S}_3$  NCs (excited at 360 nm).

| Sample               | $\text{In}_2\text{S}_3$ | alloyed Cd-In-S | white-light emitting Cd: $\text{In}_2\text{S}_3$ |        |
|----------------------|-------------------------|-----------------|--------------------------------------------------|--------|
|                      | 435 nm                  | 645 nm          | 435 nm                                           | 645 nm |
| recording wavelength | 435 nm                  | 645 nm          | 435 nm                                           | 645 nm |
| $\tau_1$ / ns        | 9.28                    | 14.3            | 11.3                                             | 17.9   |
| a                    | 100.0                   | 98.3            | 100.0                                            | 99.7   |
| $\tau_2$ / ns        |                         | 390.3           |                                                  | 558.0  |
| b                    |                         | 1.7             |                                                  | 0.3    |
